# Supplementary material for: Effect of environment on iodine oxidation state and reactivity with aluminum
Source: Royal Society of Chemistry journal article supplement (doi:10.1039/c5cp06998j), 2016-01-01
Supplement: c5cp06998j1.pdf [file c5cp06998j1.pdf]

## Effect of Environment on Iodine Oxidation State and Reactivity with Aluminum

Dylan K. Smith<sup>1</sup>, Jena McCollum<sup>1</sup>, Michelle L. Pantoya<sup>1\*</sup>

<sup>1</sup>Department of Mechanical Engineering, Texas Tech University, Lubbock, TX 79409

\*Corresponding author contact information: Phone: 806-834-3733; email: [michelle.pantoya@ttu.edu](mailto:michelle.pantoya@ttu.edu)

### Supplementary Information

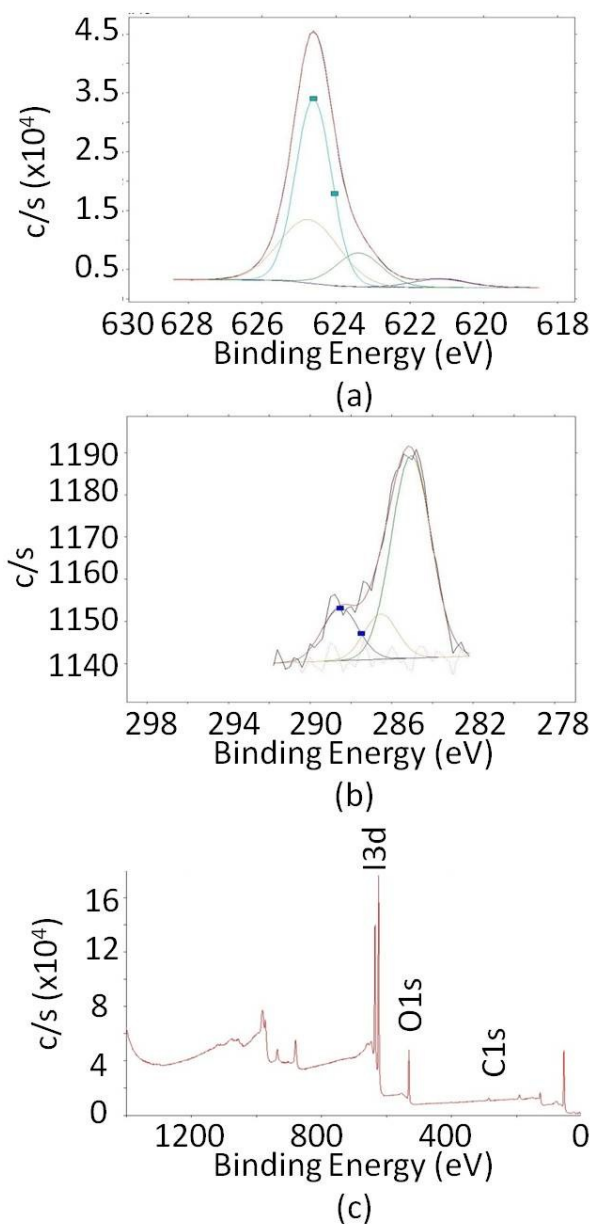

Figure S1. XPS spectra for untreated  $I_2O_5$  sample where (a) is the tight scan iodine  $3d_{5/2}$  peak, (b) is the tight scan  $C1s$  peak and (c) is the survey scan for all binding energies.

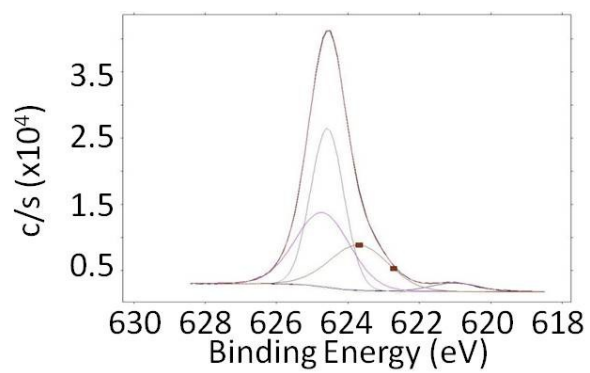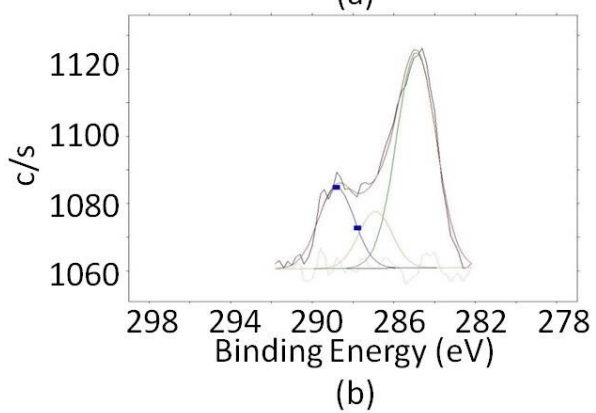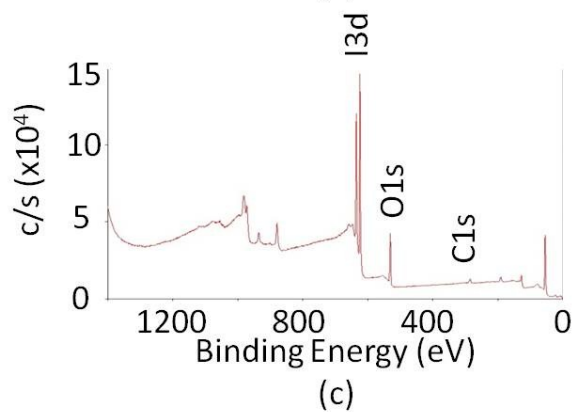

Figure S2. XPS spectra for hexane-treated I<sub>2</sub>O<sub>5</sub> samples where (a) is the tight scan iodine 3d<sub>5/2</sub> peak, (b) is the tight scan C1s peak and (c) is the survey scan for all binding energies.
